# Supplementary material
Source: PubMed Central journal article supplement (PMC1413686)
Supplement: pnas_0506361103_2.pdf [file pnas_0506361103_2.pdf]

|                                          |       |            |            |            |             |            |            |             |             |    |    |
|------------------------------------------|-------|------------|------------|------------|-------------|------------|------------|-------------|-------------|----|----|
|                                          | 1     | 11         | 21         | 31         | 41          | 51         | X          | 61          | 71          | 81 |    |
|                                          | +     |            |            |            |             |            | +          |             |             |    |    |
| <i>Crenothrix polyspora</i> unusual PmoA | GDWDF | WLDWKDRQWW | PIVTPVTLIT | FCAAVQYYNW | VNYRQIFGAT  | LCILALGAGK | WMAVYTSW   | WSNYPPNF-V  | MPATAIPGAL  |    | 85 |
| <i>Methylomonas</i> sp.LW19              | GDWDF | WTDWKDRRLW | VTVAPIVSIT | FPAAVQAQLW | WRYRPLVPGAT | LSVVALMIGE | WINRYMNFV  | WTFYPVNI-C  | FPSNLLPGAI  |    | 85 |
| <i>Methylocaldum tepidum</i>             | GDWDF | WSDWKDRRLW | VTVTPIVLVT | FPAAIQAWAW | ERFRNPWGAT  | IAVLALLFGE | WVDRYFNFW  | WTFYFPINF-V | FPAVLVPGAI  |    | 85 |
| <i>Methylocaldum szegediense</i>         | GDWDL | WADWKDRRLW | VTVTPIVLIT | FPAAIQAWAW | EKFRNPWGAT  | IAVLALLFGE | WVNRYPNFV  | WTFYFPINF-V | FPAALLVPGAI |    | 85 |
| <i>Methylococcus capsulatus</i>          | GDWDF | WSDWKDRRLW | VTVTPIVLVT | FPAAVQSYLW | ERYRPLWGAT  | VCVLGLLLGE | WINRYFNFW  | WTFYFPINF-V | FPAASLVPGAI |    | 85 |
| <i>Methylocystis</i> sp.KS9-1            | ..... | ..DWKDRRMW | PTVVPILGVT | FCAASQAFWW | VNFRLLPFGAV | FAALGLLIGE | WINRYVNFV  | WTFYFPISL-V | FPSALIVPAI  |    | 78 |
| <i>Methylocystis</i> sp.SC8-1            | ..... | .VDWKDRRMW | PTVIPILGVT | FAAAAQAFW  | ENFKLPGFAT  | FAVLGLLIGE | WINRYVNFV  | WTFYFPISL-V | FPSALIVPAL  |    | 79 |
| <i>Methylocystis</i> sp.KS9-2            | ..... | .....RMW   | PTVTPIVAMC | FAAAAQSFFW | TRFRLPIGAT  | TVLLALLIGE | WINRYDNFV  | WTFYFPINL-V | FPSALIPMGF  |    | 73 |
| <i>Methylocystis</i> sp.SC8-2            | ..... | .....RMW   | PTVAPIVAMC | FAAAVQSFLW | QKFRLLPIGAT | VACLALLVGE | WINRYNNFV  | WTFYFPINL-V | FPSALIPMGF  |    | 73 |
| <i>Nitrosococcus oceani</i>              | GDWDF | WVDWKDRRFW | VTVVPIVSVA | YPAAAQAXFW | EKFXLPGFAT  | LVTGLVLAGE | WANRYFNFW  | FTYFPINF-V  | WPTILLPMAL  |    | 85 |
| <i>Nitrosococcus</i> sp. C113            | GDWDF | WVDWKDRRFW | VTVVPIVSVA | YPAAAQAFW  | EKFRLLPGFAT | LVTGLLAGE  | WANRYFNFW  | FTYFPINF-V  | WPTILLPMAL  |    | 85 |
| <i>Nitrosomonas europaea</i>             | GDWDF | WMDWKDRQWW | PVVTPIVGIT | YCSAIMYYLW | VNYRQPFGAT  | LCVCLLIGE  | WLTRYWGFY  | WSHYPPINF-V | TPGIMLPGAL  |    | 85 |
| <i>Nitrosomonas marina</i>               | GDWDF | WLDWKDRQWW | PVVTPIVGM  | YCAALMYYLW | VNYRPLPYGAT | LCIVCLLIGE | WLTRYWGFY  | WSHYPPINF-V | LPSTMIPGAL  |    | 85 |
| <i>Nitrospira briensis</i>               | GDWDF | WLDWKDRQWW | PVVTPIVGIT | YCAAIMYYLW | VNYRPLPGFAT | LCVCLLIGE  | WLTRYWGFY  | WSHYPPINF-V | FPSTMIPGAL  |    | 85 |
| <i>Nitrosolobus multiformis</i>          | GDWDF | WLDWKDRQWW | PVVTPIVGIT | YCAAIMYYLW | VNYRPLPGFAT | LCIVCLLIGE | WLTRFWGFY  | WSHYPPNF-V  | FPSTMIPGAL  |    | 85 |
| Uncultured Crenarchaeote DQ148623        | GDYIF | YTDWANTSY- | -TVFSIGNIL | MVSVGATYY  | LFTGVPGTAT  | YYGLIMQVYT | WVAK--GAWF | ALGYPYDFIV  | TP-MWIPSCM  |    | 85 |
| Uncultured Crenarchaeote DQ148576        | GDYIF | YTDWMTSF-  | -VVFSISQST | MVAVGAIYV  | LFTGVPGTAT  | YYATIMTIYT | WVAK--GAWF | ALGYPYDFIV  | VP-IWIPSAM  |    | 85 |

|                                          |            |            |            |            |            |            |            |             |            |                     |
|------------------------------------------|------------|------------|------------|------------|------------|------------|------------|-------------|------------|---------------------|
|                                          | 91         | 111        | 121        | 131        | 141        | 151        | 161        | 171         | 181        |                     |
|                                          |            |            | X          | X          |            | X          | *X         | * *         |            |                     |
| <i>Crenothrix polyspora</i> unusual PmoA | VLDITLLLTR | -NWTLTAVIG | AWMFAALFYF | SNWPIFAYSH | TPLVVDGALL | SWADYMGFMY | VRTGTPEYIR | MIEVGLSLRTF | GGHSTMISAF | FSAF 188            |
| <i>Methylomonas</i> sp.LW19              | VLDVILMLGN | -SMTLTAVLG | GLAYGLLFYP | GNWPVIAPLH | VPVEYNGMM  | TLADLQGYHY | VRTGTPEYIR | MVEKGTLRFT  | GKDVAPX... | .....181            |
| <i>Methylocaldum tepidum</i>             | LLDTFLMLSG | -SYLFTAIVG | XMAWGLVFYP | GNWPVIAPLH | VPVEYNGMLM | SIADIQGYNY | VRTGTPEYIR | MVEKGTLRFT  | GKDVXPVS.. | .....182            |
| <i>Methylocaldum szegediense</i>         | LLDTFLMLSG | -SYLFTAIVG | GLAWGLIFYP | SNWPMIAPLH | VPVEYNGMLM | SIADIQGYHY | VRTGTPEYIR | MVEKGTLRFT  | GKDVAPVS.. | .....182            |
| <i>Methylococcus capsulatus</i>          | ILDTVLMLSG | -SYLFTAIVG | AMGWGLIFYP | GNWPIIAPLH | VPVEYNGMLM | SIADIQGYNY | VRTGTPEYIR | MVEKGTLRFT  | GKDVAPVS.. | .....182            |
| <i>Methylocystis</i> sp.KS9-1            | WLDVILLLSG | -SYVITAVVG | SLGWGLLFYP | NNWPAIAAFH | QATEQHGQLM | TLADLIGLHY | VRTSMPEYIR | MVERGTLRFT  | GKDVVPVA.. | .....182            |
| <i>Methylocystis</i> sp.SC8-1            | WLDIILLXSG | -SYVITAVVG | ALGWGLLFYP | NNWPAIAAFH | QATEQHGQLM | SLADLIGLHF | VRTSMPEYIR | MVERGTLRFT  | GKDVVPVA.. | .....182            |
| <i>Methylocystis</i> sp.KS9-2            | WLDIVLMISG | -SWLVTALLG | GLGWGLLFYP | INWPVLAQYH | QATEIDGVLL | TLADLIGFNY | VRTGTPEYIR | MIERGTLRFT  | .....      | .....174            |
| <i>Methylocystis</i> sp.SC8-2            | WLDVVLMMSG | -SWLVTALVG | SMGWGLLFYP | INWPVLAQYH | QSTEIDGVLL | TLADLIGFNY | VRTGTPEYIR | MVKRGTLRFT  | .....      | .....174            |
| <i>Nitrosococcus oceani</i>              | FLDAMLAISK | -SYGLTAVVG | GLMYGLXMYF | XNWPLLSAFH | VPAEYNGVVM | SLADIMGYQY | VRTGTPEYIR | MIEKGTLRFT  | GKDVVPVSAX | FSAX 188            |
| <i>Nitrosococcus</i> sp. C113            | FLDAMLAISK | -SYGLTAVVG | GLMYGLLMYP | ANWPLLSAFH | VPAEYNGVVM | SLADVAGYQY | VRTGTPEYIR | MVEKGTLRFT  | GKDVVPVS.. | .....182            |
| <i>Nitrosomonas europaea</i>             | MLDFTLYLTR | -NWLVTALVG | GGFGLLFYP  | GNWPIFGPTH | LPVVVEGTL  | SMADYMGHLY | VRTGTPEYVR | HIEQGLSLRTF | GGHTTVIAAF | FSAF 188            |
| <i>Nitrosomonas marina</i>               | MLDTIMLLTG | -NWLITALLG | GGFWGLLFYP | GNWPIFGPTH | LPVVVEGVLL | SVADYTGFLY | VRTGTPEYVR | LIEQGLSLRTF | GGHTTVIAAF | FSAF 188            |
| <i>Nitrospira briensis</i>               | VMDTVMLLTR | -NWMITALVG | GGAFGLLFYP | GNWPIFGPTH | LPLAAEGVLL | SVADYTGFLY | VRTGTPEYVR | NIEQGLSLRTF | GGHTTVIA.. | .....182            |
| <i>Nitrosolobus multiformis</i>          | VMDTVLLLTR | -NWMITALVG | GGAFGLLFYP | GNWPIFGPTH | LPLVAEGVLL | SVADYTGFLY | VRTGTPEYVR | LIEQGLSLRTF | GGHTTVIASF | FSAF 188            |
| Uncultured Crenarchaeote DQ148623        | LLDLAYWATK | RNKHSILFG  | GVLVGMSEF  | PLFMVN     | LLTVADE    | ETA        | FKY        | PRPTLPPYMW  | PIEPVGVKFY | NSPVALGAGA GSVL 188 |
| Uncultured Crenarchaeote DQ148576        | LLDLTYWATR | RNKHAILIG  | GSLIGLSL   | PLFMVN     | LLLIRDE    | EVA        | FKY        | PRPTLPPYMW  | PIEPVGVKFY | NSPVALGAGA GAVL 188 |
