# Supplementary material
Source: PubMed Central journal article supplement (PMC1413686)

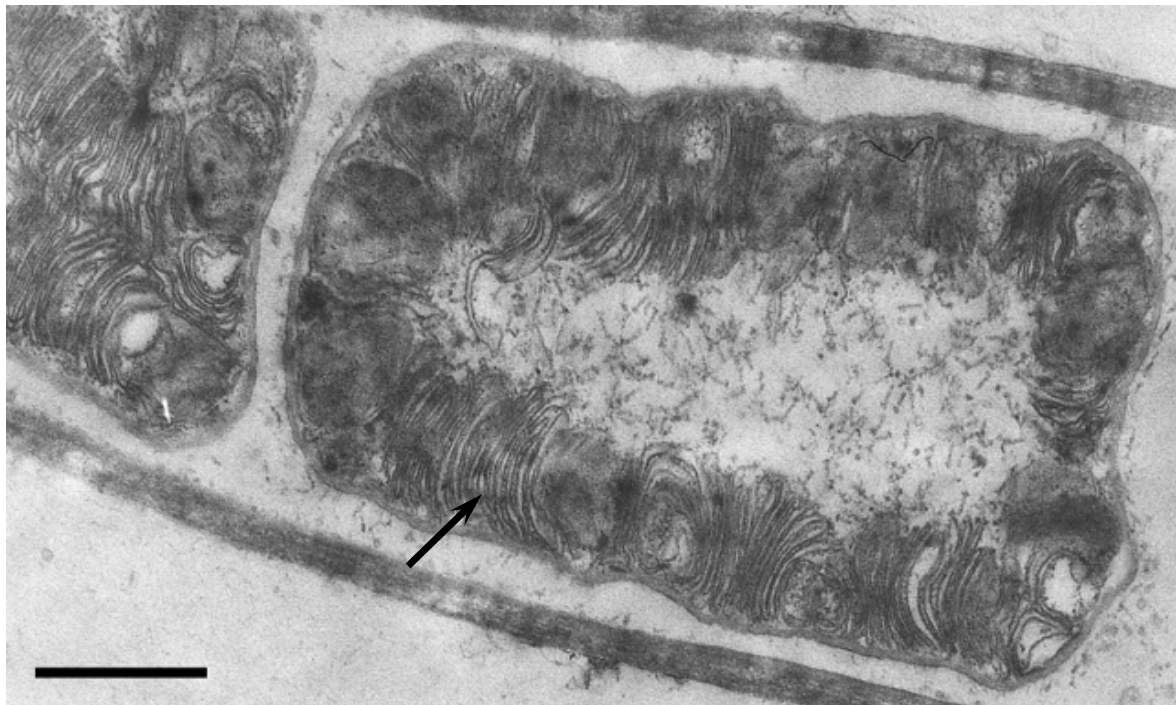

Supplement: pnas_0506361103_1.pdf [file pnas_0506361103_1.pdf]

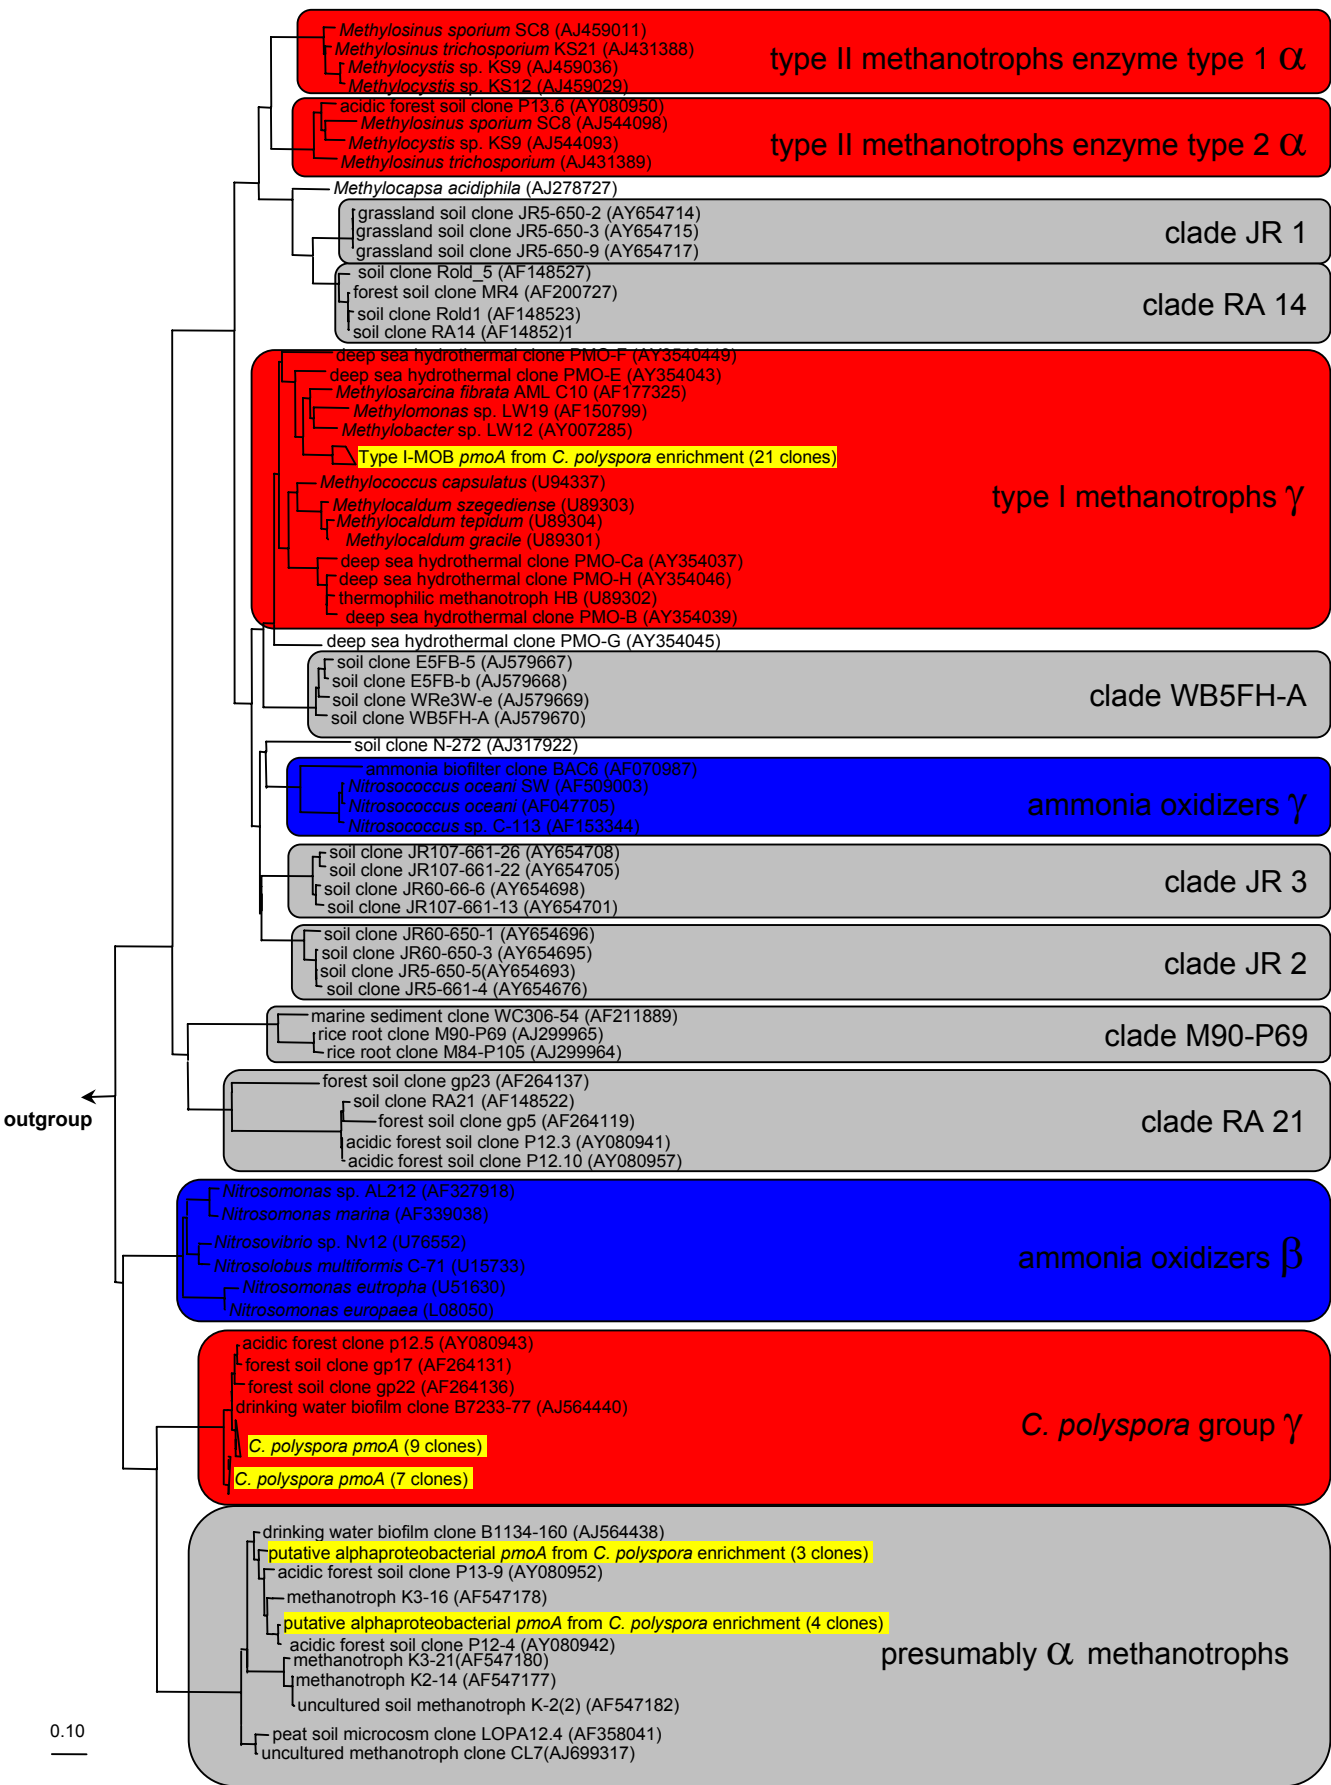

Supplement: pnas_0506361103_3.pdf [file pnas_0506361103_3.pdf]

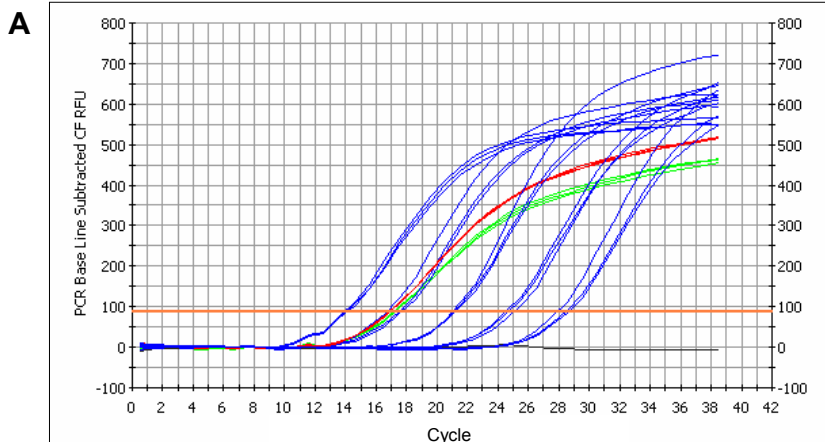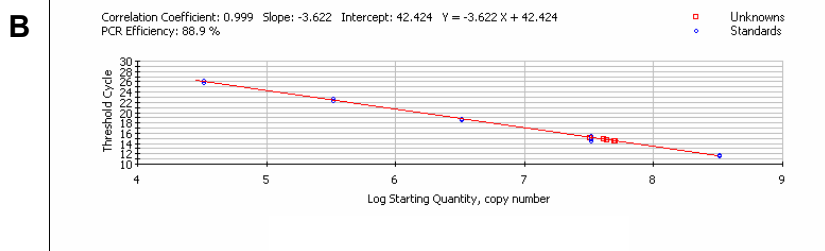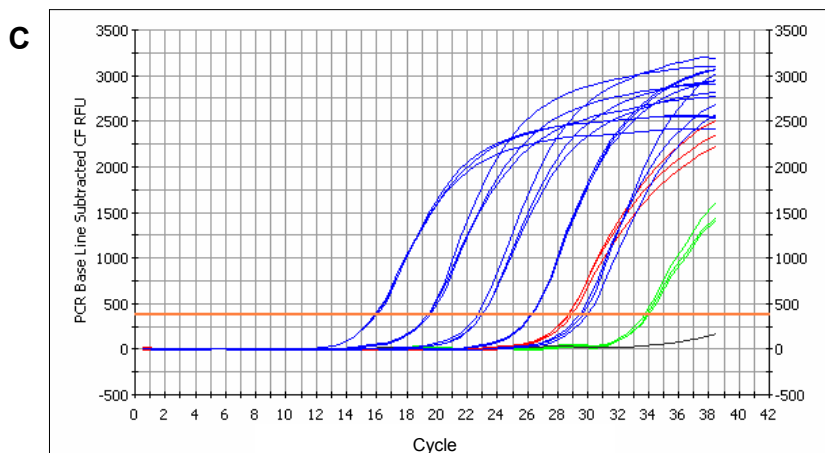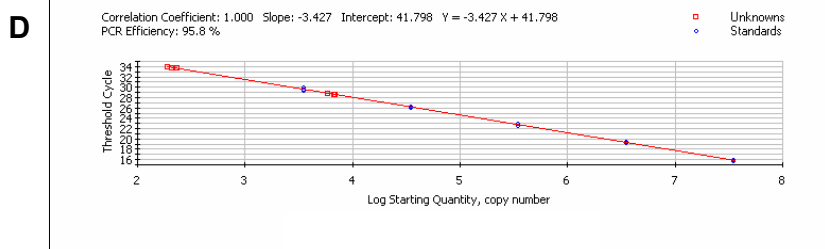

Supplement: pnas_0506361103_4.pdf [file pnas_0506361103_4.pdf]
